# Supplementary material for: Persistence of Brucella abortus in the Bone Marrow of Infected Mice
Source: Hindawi journal article supplement (doi:10.1155/2018/5370414), 2018-12-03
Supplement: f1 [file 5370414.f1.pdf]

Table S1. Antibodies used for identifying each cell population

| Cell type                         | Staining scheme                                                                                                                                        |
|-----------------------------------|--------------------------------------------------------------------------------------------------------------------------------------------------------|
| Granulocytes                      | CD11b <sup>+</sup> Ly6G <sup>+</sup>                                                                                                                   |
| Neutrophils                       | CD11b <sup>+</sup> CD115 <sup>-</sup> Ly6G <sup>+</sup>                                                                                                |
| Eosinophils                       | CD11b <sup>+</sup> Ly6G <sup>-</sup> F4/80 <sup>+</sup> SSC <sup>high</sup>                                                                            |
| GMP                               | CD11b <sup>-</sup> CD3 <sup>-</sup> Ly6G <sup>-</sup> CD19 <sup>-</sup> cKit <sup>+</sup><br>Sca <sup>low</sup> CD16/32 <sup>+</sup> CD34 <sup>+</sup> |
| MEP                               | CD11b <sup>-</sup> CD3 <sup>-</sup> Ly6G <sup>-</sup> CD19 <sup>-</sup> cKit <sup>+</sup><br>Sca <sup>low</sup> CD16/32 <sup>-</sup> CD34 <sup>-</sup> |
| Monocytes                         | CD11b <sup>+</sup> CD115 <sup>+</sup> SSC <sup>low</sup>                                                                                               |
| Macrophages (CD11b <sup>-</sup> ) | CD11b <sup>+</sup> Ly6G <sup>+</sup> F4/80 <sup>+</sup> SSC <sup>low</sup>                                                                             |
| Macrophages (CD11b <sup>+</sup> ) | CD11b <sup>-</sup> Ly6G <sup>-/low</sup> F4/80 <sup>+</sup> SSC <sup>low</sup>                                                                         |
| T cells (CD4 <sup>+</sup> )       | CD11b <sup>-</sup> CD3 <sup>+</sup> CD4 <sup>+</sup>                                                                                                   |
| T cells (CD8 <sup>+</sup> )       | CD11b <sup>-</sup> CD3 <sup>+</sup> CD4 <sup>-</sup> CD8 <sup>+</sup>                                                                                  |
| B cells                           | B220 <sup>+</sup> CD19 <sup>+</sup> CD3 <sup>-</sup>                                                                                                   |
